# Supplementary material for: Does the Contractile Capability of Pelvic Floor Muscles Improve with Knowledge Acquisition and Verbal Instructions in Healthy Women? A Systematic Review
Source: MDPI journal article supplement (doi:10.3390/ijerph19159308), 2022-07-29
Supplement: s1 [file s1]

**Supplementary Material Table S1.** Search strategy by databases.

| DATABASE                                               | SEARCH STRATEGY                                                                                                                                                                                                                                                                                                                                                                                                                                                                                                                                                                                                                                                                                                                                                                         |
|--------------------------------------------------------|-----------------------------------------------------------------------------------------------------------------------------------------------------------------------------------------------------------------------------------------------------------------------------------------------------------------------------------------------------------------------------------------------------------------------------------------------------------------------------------------------------------------------------------------------------------------------------------------------------------------------------------------------------------------------------------------------------------------------------------------------------------------------------------------|
| <p><b>Common to all databases (except Dialnet)</b></p> | <ul style="list-style-type: none"> <li>- Pelvic floor and assessment and educative intervention</li> <li>- Pelvic floor and awareness and education</li> <li>- Pelvic floor and awareness and educative intervention</li> <li>- Pelvic floor muscle and proprioception</li> <li>- Pelvic floor muscle contraction and awareness and education</li> <li>- Pelvic floor muscle contraction and awareness and educative intervention</li> <li>- (pelvic floor muscle or pelvic floor muscle contraction) and (perception or proprioception or awareness or self-perception) and female and physiotherapy</li> </ul>                                                                                                                                                                        |
| <p><b>PubMed</b></p>                                   | <ul style="list-style-type: none"> <li>- Pelvic floor and awareness and education and intervention</li> <li>- Pelvic floor and proprioception</li> <li>- Pelvic floor and proprioception and education</li> <li>- Pelvic floor muscle and awareness</li> <li>- Pelvic floor muscle and perception</li> <li>- Pelvic floor muscle and self-perception</li> <li>- Pelvic floor muscle contraction and assessment and education</li> <li>- Pelvic floor muscle contraction and awareness and education and intervention</li> <li>- Pelvic floor muscle contraction and awareness and educative program</li> <li>- Pelvic floor muscle contraction and proprioception and education</li> <li>- Pelvic floor muscle contraction and proprioception and education and intervention</li> </ul> |
|                                                        |                                                                                                                                                                                                                                                                                                                                                                                                                                                                                                                                                                                                                                                                                                                                                                                         |

| DATABASE                       | SEARCH STRATEGY                                                                                                                                                                                                                                                                                                                                                                                                                                                                                                                                                                                                                                                                                                                                                                                                                     |
|--------------------------------|-------------------------------------------------------------------------------------------------------------------------------------------------------------------------------------------------------------------------------------------------------------------------------------------------------------------------------------------------------------------------------------------------------------------------------------------------------------------------------------------------------------------------------------------------------------------------------------------------------------------------------------------------------------------------------------------------------------------------------------------------------------------------------------------------------------------------------------|
| <p><b>Cochrane Library</b></p> | <ul style="list-style-type: none"> <li>- Pelvic floor and awareness and education and intervention</li> <li>- Pelvic floor and proprioception and education</li> <li>- Pelvic floor muscle and awareness</li> <li>- Pelvic floor muscle and perception</li> <li>- Pelvic floor muscle contraction and assessment and education</li> <li>- Pelvic floor muscle contraction and assessment and physiotherapy</li> <li>- Pelvic floor muscle contraction and awareness and education and intervention</li> <li>- Pelvic floor muscle contraction and awareness and educative program</li> <li>- Pelvic floor muscle contraction and proprioception</li> <li>- Pelvic floor muscle contraction and proprioception and education</li> <li>- Pelvic floor muscle contraction and proprioception and education and intervention</li> </ul> |
|                                |                                                                                                                                                                                                                                                                                                                                                                                                                                                                                                                                                                                                                                                                                                                                                                                                                                     |

| DATABASE | SEARCH STRATEGY                                                                                                                                                                                                                                                                                                                                                                                                                                                                                                                                                                                                                                                                                                                                                                                                                                                                                                                                                                                                                                                                                                                                                                                                                                                                                                                      |
|----------|--------------------------------------------------------------------------------------------------------------------------------------------------------------------------------------------------------------------------------------------------------------------------------------------------------------------------------------------------------------------------------------------------------------------------------------------------------------------------------------------------------------------------------------------------------------------------------------------------------------------------------------------------------------------------------------------------------------------------------------------------------------------------------------------------------------------------------------------------------------------------------------------------------------------------------------------------------------------------------------------------------------------------------------------------------------------------------------------------------------------------------------------------------------------------------------------------------------------------------------------------------------------------------------------------------------------------------------|
| PEDro    | <ul style="list-style-type: none"> <li>- Pelvic floor and proprioception</li> <li>- Pelvic floor muscle and awareness</li> <li>- Pelvic floor muscle and contraction</li> <li>- Pelvic floor muscle and contraction and awareness</li> <li>- Pelvic floor muscle and motor control</li> <li>- Pelvic floor muscle contraction and awareness and educative program</li> <li>- Pelvic floor muscle contraction and awareness and educative programme</li> <li>- Pelvic floor muscle contraction and education</li> <li>- Pelvic floor and awareness + therapy (behaviour modification) (advanced search)</li> <li>- Pelvic floor and awareness + therapy (education) (advanced search)</li> <li>- Pelvic floor and awareness + therapy (health promotion) (advanced search)</li> <li>- Pelvic floor and awareness and intervention + therapy (education) (advanced search)</li> <li>- Pelvic floor muscle contraction and assessment + therapy (education) (advanced search)</li> <li>- Pelvic floor muscle contraction and awareness and intervention + therapy (education) (advanced search)</li> <li>- Pelvic floor muscle contraction and proprioception + therapy (education) (advanced search)</li> <li>- Pelvic floor muscle contraction and proprioception and intervention + therapy (education) (advanced search)</li> </ul> |
|          |                                                                                                                                                                                                                                                                                                                                                                                                                                                                                                                                                                                                                                                                                                                                                                                                                                                                                                                                                                                                                                                                                                                                                                                                                                                                                                                                      |

| DATABASE             | SEARCH STRATEGY                                                                                                                                                                                                                                                                                                                                                                                                                                                                                                                                                                                                                                                                                                                                                                                                                                                                                                                                                                                                                      |
|----------------------|--------------------------------------------------------------------------------------------------------------------------------------------------------------------------------------------------------------------------------------------------------------------------------------------------------------------------------------------------------------------------------------------------------------------------------------------------------------------------------------------------------------------------------------------------------------------------------------------------------------------------------------------------------------------------------------------------------------------------------------------------------------------------------------------------------------------------------------------------------------------------------------------------------------------------------------------------------------------------------------------------------------------------------------|
| <p><b>Scopus</b></p> | <ul style="list-style-type: none"> <li>- Pelvic floor and awareness and education and intervention</li> <li>- Pelvic floor and proprioception</li> <li>- Pelvic floor muscle and awareness</li> <li>- Pelvic floor muscle and contraction and proprioception</li> <li>- Pelvic floor muscle and perception</li> <li>- Pelvic floor muscle and perception and physiotherapy</li> <li>- Pelvic floor muscle contraction and assessment and education</li> <li>- Pelvic floor muscle contraction and awareness and education and intervention</li> <li>- Pelvic floor muscle contraction and awareness and educative program</li> <li>- Pelvic floor muscle contraction and awareness and educative programme</li> <li>- Pelvic floor muscle contraction and perception</li> <li>- Pelvic floor muscle contraction and perception and physiotherapy</li> <li>- Pelvic floor muscle contraction and proprioception and education</li> <li>- Pelvic floor muscle contraction and proprioception and education and intervention</li> </ul> |
|                      |                                                                                                                                                                                                                                                                                                                                                                                                                                                                                                                                                                                                                                                                                                                                                                                                                                                                                                                                                                                                                                      |

| DATABASE       | SEARCH STRATEGY                                                                                                                                                                                                                                                                                                                                                                                                                                                                                                                                                                                                                                                                                                                                                                                                                                                                                                                                                                                                                                                                                                                                                                                            |
|----------------|------------------------------------------------------------------------------------------------------------------------------------------------------------------------------------------------------------------------------------------------------------------------------------------------------------------------------------------------------------------------------------------------------------------------------------------------------------------------------------------------------------------------------------------------------------------------------------------------------------------------------------------------------------------------------------------------------------------------------------------------------------------------------------------------------------------------------------------------------------------------------------------------------------------------------------------------------------------------------------------------------------------------------------------------------------------------------------------------------------------------------------------------------------------------------------------------------------|
| Web of Science | <ul style="list-style-type: none"> <li>- Pelvic floor and awareness and education and intervention</li> <li>- Pelvic floor muscle and awareness + rehabilitation</li> <li>- Pelvic floor muscle and perception and physiotherapy</li> <li>- Pelvic floor muscle contraction and assessment</li> <li>- Pelvic floor muscle contraction and assessment and education</li> <li>- Pelvic floor muscle contraction and assessment and physiotherapy</li> <li>- Pelvic floor muscle contraction and awareness and education and intervention</li> <li>- Pelvic floor muscle contraction and awareness and educative program or educative programme + analyse results + rehabilitation + health care science service</li> <li>- Pelvic floor muscle contraction and awareness and educative program or educative programme + analyse results + rehabilitation + health care science service + nursing</li> <li>- Pelvic floor muscle contraction and proprioception and education</li> <li>- Pelvic floor muscle contraction and proprioception and education and intervention</li> <li>- Pelvic floor muscle contraction and (awareness or proprioception or perception) and female and physiotherapy</li> </ul> |
|                |                                                                                                                                                                                                                                                                                                                                                                                                                                                                                                                                                                                                                                                                                                                                                                                                                                                                                                                                                                                                                                                                                                                                                                                                            |

| DATABASE       | SEARCH STRATEGY                                                                                                                                                                                                                                                                                                                                                                                                                                                                                                                                                                                                                                                                                                                                                                                                                                                                                                                                                                                                                                                                                                                                                                                                                                                                                                                                                                                                                                                                                                                                                                                                                                                                                                                                                                         |
|----------------|-----------------------------------------------------------------------------------------------------------------------------------------------------------------------------------------------------------------------------------------------------------------------------------------------------------------------------------------------------------------------------------------------------------------------------------------------------------------------------------------------------------------------------------------------------------------------------------------------------------------------------------------------------------------------------------------------------------------------------------------------------------------------------------------------------------------------------------------------------------------------------------------------------------------------------------------------------------------------------------------------------------------------------------------------------------------------------------------------------------------------------------------------------------------------------------------------------------------------------------------------------------------------------------------------------------------------------------------------------------------------------------------------------------------------------------------------------------------------------------------------------------------------------------------------------------------------------------------------------------------------------------------------------------------------------------------------------------------------------------------------------------------------------------------|
| <b>Dialnet</b> | <ul style="list-style-type: none"> <li>- Contracción and suelo pélvico and concienciación/conciencia and educación</li> <li>- Contracción and suelo pélvico and concienciación/conciencia and educación and intervención</li> <li>- Contracción and suelo pélvico and concienciación/conciencia and programa educativo</li> <li>- Contracción and suelo pélvico and evaluación/valoración and educación</li> <li>- Contracción and suelo pélvico and propiocepción and educación</li> <li>- Contracción and suelo pélvico and propiocepción and educación and intervención</li> <li>- Contracción      musculatura      suelo      pélvico      and concienciación/conciencia and educación</li> <li>- Contracción      musculatura      suelo      pélvico      and concienciación/conciencia and intervención educativa</li> <li>- Suelo pélvico and concienciación/conciencia and educación</li> <li>- Suelo pélvico and concienciación/conciencia and educación and intervención</li> <li>- Suelo pélvico and concienciación/conciencia and intervención educativa</li> <li>- Suelo pélvico and evaluación and intervención educativa</li> <li>- Suelo pélvico and musculatura and concienciación</li> <li>- Suelo pélvico and musculatura and contracción and concienciación</li> <li>- Suelo pélvico and musculatura and contracción and propiocepción</li> <li>- Suelo pélvico and musculatura and control motor</li> <li>- Suelo pélvico and musculatura and percepción</li> <li>- Suelo pélvico and musculatura and propiocepción</li> <li>- Suelo pélvico and valoración and intervención educativa</li> <li>- (musculatura suelo pélvico or contracción musculatura suelo pélvico) and (percepción or propiocepción or autopercepción) and mujer and fisioterapia</li> </ul> |
|                |                                                                                                                                                                                                                                                                                                                                                                                                                                                                                                                                                                                                                                                                                                                                                                                                                                                                                                                                                                                                                                                                                                                                                                                                                                                                                                                                                                                                                                                                                                                                                                                                                                                                                                                                                                                         |

| DATABASE             | SEARCH STRATEGY                                                                                                                                                                                                                                                                                                                                                                                                                                                                                                                                                                                                                                                                                                                                                                                                                                                                                                                                                                      |
|----------------------|--------------------------------------------------------------------------------------------------------------------------------------------------------------------------------------------------------------------------------------------------------------------------------------------------------------------------------------------------------------------------------------------------------------------------------------------------------------------------------------------------------------------------------------------------------------------------------------------------------------------------------------------------------------------------------------------------------------------------------------------------------------------------------------------------------------------------------------------------------------------------------------------------------------------------------------------------------------------------------------|
| <p><b>Lilacs</b></p> | <ul style="list-style-type: none"> <li>- Pelvic floor and awareness and education and intervention</li> <li>- Pelvic floor and perception</li> <li>- Pelvic floor and proprioception</li> <li>- Pelvic floor muscle and awareness</li> <li>- Pelvic floor muscle and contraction and perception</li> <li>- Pelvic floor muscle and perception</li> <li>- Pelvic floor muscle contraction and assessment and education</li> <li>- Pelvic floor muscle contraction and awareness</li> <li>- Pelvic floor muscle contraction and awareness and education and intervention</li> <li>- Pelvic floor muscle contraction and awareness and educative program</li> <li>- Pelvic floor muscle contraction and awareness and educative programme</li> <li>- Pelvic floor muscle contraction and perception</li> <li>- Pelvic floor muscle contraction and proprioception and education</li> <li>- Pelvic floor muscle contraction and proprioception and education and intervention</li> </ul> |

**Supplementary Material Table S2.** Methodological quality analysis of clinical trials measured on the PEDro scale

| PEDro items                                           | 1   | 2   | 3   | 4   | 5   | 6  | 7   | 8   | 9   | 10  | 11  | TOTAL SCORE /10 |
|-------------------------------------------------------|-----|-----|-----|-----|-----|----|-----|-----|-----|-----|-----|-----------------|
| <b>Mørkved, S. <i>et al.</i><sup>17</sup></b>         | Yes | Yes | Yes | Yes | Yes | No | Yes | Yes | Yes | Yes | Yes | 9/10            |
| <b>Sampselle, C.M. <i>et al.</i><sup>18</sup></b>     | Yes | Yes | No  | Yes | No  | No | No  | Yes | Yes | Yes | No  | 5/10            |
| <b>Aliaga-Martínez, F. <i>et al.</i><sup>20</sup></b> | Yes | No  | No  | Yes | No  | No | No  | Yes | Yes | Yes | Yes | 5/10            |



**Supplementary Material Table S3.** Methodological quality analysis of no-randomised studies measured on the NOS scale.

|                         |                                                                                                                                         | Talas<br>z, H.<br><i>et al.</i> <sup>19</sup> | Hend<br>erson,<br>J.W.<br><i>et al.</i> <sup>21</sup> | Verm<br>andel,<br>A. <i>et</i><br><i>al.</i> <sup>22</sup> | Uechi<br>, N. <i>et</i><br><i>al.</i> <sup>23</sup> |
|-------------------------|-----------------------------------------------------------------------------------------------------------------------------------------|-----------------------------------------------|-------------------------------------------------------|------------------------------------------------------------|-----------------------------------------------------|
| <b>Selection</b>        | Representativeness of the sample                                                                                                        | *                                             | *                                                     | *                                                          | *                                                   |
|                         | Sample Size                                                                                                                             | No                                            | No                                                    | No                                                         | *                                                   |
|                         | Ascertainment of the exposure (disease)                                                                                                 | *                                             | **                                                    | **                                                         | **                                                  |
|                         | Non-respondents                                                                                                                         | No                                            | No                                                    | No                                                         | No                                                  |
| <b>Comparability</b>    | The subjects in different outcome groups are comparable, based on the study design or analysis. Confounding factors are controlled for. | *                                             | *                                                     | *                                                          | *                                                   |
| <b>Outcome</b>          | Assessment of the outcome                                                                                                               | **                                            | **                                                    | **                                                         | **                                                  |
|                         | Statistical test                                                                                                                        | *                                             | *                                                     | *                                                          | *                                                   |
| <b>TOTAL SCORE: /10</b> |                                                                                                                                         | <b>6</b>                                      | <b>8</b>                                              | <b>7</b>                                                   | <b>8</b>                                            |

or \*\*: identification of high quality choices. Some sections have a maximum score of one \* and others of \*\*
